# Supplementary material for: Wind conditions and geography shape the first outbound migration of juvenile honey buzzards and their distribution across sub-Saharan Africa
Source: PubMed Central journal article supplement (PMC5454264; doi:10.1098/rspb.2017.0387), 2017-05-24
Supplement: rspb20170387supp4.pdf [file rspb20170387supp4.pdf]

| Bird      | Nick name        | Device        | Sex      | Territory           | Tag date          | Death/Tag failure |                          |
|-----------|------------------|---------------|----------|---------------------|-------------------|-------------------|--------------------------|
|           |                  |               |          |                     |                   | Date              | Context                  |
| <i>F1</i> | <i>Elisabeth</i> | <i>118750</i> | <i>f</i> | <i>Kenkirämäkkä</i> | <i>06/08/2012</i> | <i>Aug-12</i>     | <i>Predated on nest</i>  |
| F2        | Lisa             | 118749        | f        | Näätäsalu           | 02/08/2013        | 11/10/2013        | Never left roost         |
| F3        | Emma             | HBFI03        | f        | Lammassaari         | 05/08/2013        | 14/10/2013        | Stop transmission        |
| F4        | Roosa            | 59612         | f        | Mäyrää              | 05/08/2011        | 09/02/2012        | Stop transmission        |
| F5        | Gilda            | 59956         | f        | Mäyrää              | 08/08/2012        | 09/11/2012        | Corpse retrieved         |
| F6        | Kirsi            | 118748        | f        | Sideby              | 10/08/2012        | 13/11/2012        | Corpse retrieved         |
| F7        | Puff             | 59957         | f        | Kenkirämäkkä        | 06/08/2011        | 14/05/2013        | Never left roost         |
| F8        | Ulla             | HBFI01        | f        | Lammassaari         | 05/08/2013        | 09/12/2013        | Stop transmission        |
| F9        | Ella             | 59956         | f        | Saastojärvi         | 13/08/2013        | 16/12/2013        | Stop transmission        |
| F10       | Julia            | HBFI02        | f        | Murtoonjärvi        | 16/08/2013        | 13/01/2014        | Stop transmission        |
| F11       | Aida             | 118746        | f        | Puskankytö          | 02/08/2012        | 18/07/2014        | Corpse retrieved         |
| F12       | Heidi            | 118748        | f        | Niemenkylä          | 08/08/2013        | 20/12/2014        | Stop transmission        |
| F13       | Venus            | 59964         | f        | Kietare             | 08/08/2012        | 12/05/2015        | Never left roost         |
| F14       | Jaana            | 59804         | f        | Lavia               | 28/07/2011        | 13/05/2015        | Corpse retrieved         |
| F15       | Edit             | HBFI08        | f        | Näätäsalu           | 02/08/2013        | 18/06/2015        | Stop transmission        |
| F16       | Anni             | HBFI07        | f        | Mäyrää              | 05/08/2013        | 21/07/2016        | Stop transmission        |
| F17       | Senta            | 59955         | f        | Särkijärvi          | 08/08/2012        | alive             | -                        |
| <i>M1</i> | <i>Clark</i>     | <i>118749</i> | <i>m</i> | <i>Kietare</i>      | <i>08/08/2012</i> | <i>Aug-12</i>     | <i>Died on nest</i>      |
| <i>M2</i> | <i>Hannu</i>     | <i>59954</i>  | <i>m</i> | <i>Kenkirämäkkä</i> | <i>06/08/2012</i> | <i>Aug-12</i>     | <i>Predated on nest</i>  |
| <i>M3</i> | <i>Ivar</i>      | <i>118750</i> | <i>m</i> | <i>Sideby</i>       | <i>06/08/2013</i> | <i>21/09/2013</i> | <i>Stop transmission</i> |
| M4        | Sven             | 223           | m        | Sideby              | 06/08/2013        | 06/10/2013        | Stop transmission        |
| M5        | Miikka           | HBFI06        | m        | Niemenkylä          | 08/08/2013        | 04/04/2014        | Large gaps in data       |
| M6        | Piff             | 59644         | m        | Kenkirämäkkä        | 06/08/2011        | 18/02/2012        | Stop transmission        |
| M7        | Tor              | 59806         | m        | Sarkola             | 28/07/2012        | 29/12/2012        | Stop transmission        |
| M8        | Rudolf           | 59358         | m        | Kotaneva            | 02/08/2012        | 31/01/2013        | Stop transmission        |
| M9        | Hans             | 59963         | m        | Puskankytö          | 02/08/2012        | 22/03/2014        | Stop transmission        |
| M10       | Viljo            | 400           | m        | Poola               | 02/08/2014        | 26/10/2014        | Stop transmission        |
| M11       | Matti            | HBFI05        | m        | Kotaneva            | 09/08/2013        | 28/05/2015        | Never left roost         |
| M12       | Lars             | 59805         | m        | Kalax J             | 08/08/2011        | 04/10/2015        | Stop transmission        |
| M13       | Valentin         | 118747        | m        | Mäyrää              | 08/08/2012        | 09/03/2016        | Stop transmission        |
| M14       | Mohammed         | HBFI04        | m        | Saastojärvi         | 13/08/2013        | alive             | -                        |

**Table S1** Metadata of 17 female and 14 male juvenile honey buzzards satellite-tagged as fledglings in southern Finland. Individuals highlighted in italics died before or just after initiating their first autumn migration and were not used in our analyses. We used all remaining 27 birds to model hourly longitudinal bird speeds ( $U_{\text{bird}}$ ) as a function of the hourly zonal wind component ( $U_{\text{wind}}$ ) and latitudinal wind component ( $V_{\text{wind}}$ ) encountered en route. Three more birds died before completing migration and tracking data for one bird had large gaps (M5). Therefore, we only used the remaining 23 survivors highlighted in light grey to model the total longitudinal shift ( $\Delta_{\text{long}}$  [°]) of juvenile honey buzzards between the start and the end of their migratory journey.
