# Supplementary material for: Wind conditions and geography shape the first outbound migration of juvenile honey buzzards and their distribution across sub-Saharan Africa
Source: PubMed Central journal article supplement (PMC5454264; doi:10.1098/rspb.2017.0387), 2017-05-24
Supplement: rspb20170387supp5.pdf [file rspb20170387supp5.pdf]

| Nick name | N   | $U_{\text{bird}} [\text{ms}^{-1}]$ |      |        |       | $U_{\text{wind}} [\text{ms}^{-1}]$ |      |        |       | $V_{\text{wind}} [\text{ms}^{-1}]$ |      |        |       |
|-----------|-----|------------------------------------|------|--------|-------|------------------------------------|------|--------|-------|------------------------------------|------|--------|-------|
|           |     | mean                               | SE   | min    | max   | mean                               | SE   | min    | max   | mean                               | SE   | min    | max   |
| Aida      | 74  | -0.24                              | 0.48 | -12.12 | 9.21  | 1.06                               | 0.61 | -9.47  | 10.30 | -0.24                              | 0.51 | -8.63  | 12.49 |
| Anni      | 180 | 1.01                               | 0.35 | -10.26 | 15.16 | 1.25                               | 0.43 | -7.74  | 14.27 | -2.35                              | 0.35 | -13.20 | 9.33  |
| Edit      | 160 | -0.75                              | 0.31 | -12.41 | 6.82  | 0.11                               | 0.33 | -7.71  | 11.98 | -0.76                              | 0.34 | -11.31 | 8.71  |
| Ella      | 99  | 0.01                               | 0.49 | -10.28 | 15.81 | -0.67                              | 0.55 | -9.78  | 12.70 | -3.00                              | 0.43 | -13.79 | 7.31  |
| Emma      | 114 | -0.33                              | 0.35 | -11.26 | 7.22  | 1.04                               | 0.37 | -6.68  | 9.93  | 1.40                               | 0.38 | -5.04  | 11.44 |
| Gilda     | 95  | -1.09                              | 0.32 | -9.02  | 8.77  | 2.34                               | 0.45 | -6.21  | 13.26 | 0.89                               | 0.48 | -10.33 | 11.24 |
| Hans      | 71  | -0.61                              | 0.38 | -14.87 | 5.94  | -0.08                              | 0.29 | -4.45  | 7.87  | 1.63                               | 0.35 | -8.70  | 9.29  |
| Heidi     | 60  | -1.49                              | 0.56 | -13.21 | 7.96  | -2.18                              | 0.52 | -8.71  | 6.08  | -2.71                              | 0.50 | -12.36 | 4.41  |
| Jaana     | 42  | -1.33                              | 0.61 | -12.27 | 7.36  | -2.28                              | 0.68 | -9.44  | 6.52  | 0.00                               | 0.45 | -4.87  | 9.59  |
| Julia     | 138 | 0.27                               | 0.43 | -12.54 | 13.33 | 0.47                               | 0.48 | -8.59  | 13.78 | -3.48                              | 0.39 | -11.86 | 9.76  |
| Kirsi     | 65  | -0.65                              | 0.42 | -8.87  | 7.63  | 0.37                               | 0.58 | -5.61  | 10.93 | 0.35                               | 0.44 | -5.90  | 13.28 |
| Lars      | 81  | -0.58                              | 0.39 | -9.13  | 11.04 | -1.38                              | 0.44 | -8.88  | 9.07  | 0.06                               | 0.33 | -6.65  | 9.22  |
| Lisa      | 61  | -0.06                              | 0.49 | -11.34 | 8.90  | 0.21                               | 0.56 | -7.02  | 10.57 | 0.94                               | 0.52 | -9.59  | 8.83  |
| Matti     | 208 | -2.39                              | 0.25 | -9.93  | 8.68  | -1.59                              | 0.30 | -11.04 | 9.95  | 0.30                               | 0.19 | -7.04  | 7.92  |
| Miikka    | 98  | 2.62                               | 0.40 | -7.44  | 14.18 | 2.13                               | 0.39 | -6.60  | 10.02 | -1.70                              | 0.40 | -8.56  | 7.99  |
| Mohammed  | 174 | 0.24                               | 0.37 | -11.22 | 10.92 | 1.33                               | 0.39 | -9.44  | 10.40 | -2.36                              | 0.23 | -8.99  | 4.12  |
| Piff      | 44  | -1.05                              | 0.59 | -8.93  | 6.46  | -1.46                              | 0.69 | -9.03  | 10.40 | -0.59                              | 0.60 | -7.59  | 9.42  |
| Puff      | 51  | -0.82                              | 0.39 | -5.84  | 7.35  | -1.68                              | 0.55 | -8.76  | 7.34  | -1.65                              | 0.39 | -7.17  | 8.80  |
| Roosa     | 57  | -1.06                              | 0.41 | -7.41  | 4.79  | -1.51                              | 0.73 | -10.82 | 18.85 | 0.12                               | 0.42 | -5.31  | 8.31  |
| Rudolf    | 87  | -0.59                              | 0.34 | -7.89  | 9.99  | 0.48                               | 0.48 | -7.03  | 14.38 | -0.33                              | 0.37 | -10.08 | 10.38 |
| Senta     | 43  | -1.36                              | 0.70 | -10.44 | 7.95  | 0.29                               | 0.76 | -9.12  | 13.14 | -1.31                              | 0.42 | -5.58  | 4.89  |
| Sven      | 74  | -1.75                              | 0.55 | -13.98 | 6.74  | -0.13                              | 0.54 | -7.01  | 12.23 | -1.37                              | 0.64 | -10.85 | 10.64 |
| Tor       | 45  | -0.32                              | 0.56 | -8.36  | 9.68  | -0.35                              | 0.86 | -9.25  | 13.82 | -1.92                              | 0.48 | -9.70  | 5.41  |
| Ulla      | 151 | 0.05                               | 0.49 | -12.77 | 13.45 | 0.47                               | 0.34 | -6.67  | 14.56 | -2.24                              | 0.30 | -10.14 | 9.36  |
| Valentin  | 85  | -0.47                              | 0.27 | -6.19  | 4.79  | 3.46                               | 0.50 | -6.12  | 17.12 | 1.21                               | 0.48 | -9.50  | 11.17 |
| Venus     | 56  | -3.29                              | 0.49 | -13.89 | 5.77  | -1.03                              | 0.52 | -7.58  | 7.54  | -0.62                              | 0.39 | -6.22  | 6.70  |
| Viljo     | 129 | -2.70                              | 0.24 | -9.46  | 4.05  | -2.92                              | 0.34 | -9.32  | 6.41  | 0.96                               | 0.24 | -3.54  | 9.25  |

**Table S2** Summary statistics for 27 birds that were used for modelling hourly longitudinal bird speed, showing sample size (N; i.e. number of GPS-fixes) as well as the mean, standard error (SE), minimum and maximum hourly longitudinal bird speed ( $U_{\text{bird}}$ ), hourly zonal wind speed ( $U_{\text{wind}}$ ) and hourly latitudinal wind speed ( $V_{\text{wind}}$ ) per bird.
