# Supplementary material for: Wind conditions and geography shape the first outbound migration of juvenile honey buzzards and their distribution across sub-Saharan Africa
Source: PubMed Central journal article supplement (PMC5454264; doi:10.1098/rspb.2017.0387), 2017-05-24
Supplement: rspb20170387supp6.pdf [file rspb20170387supp6.pdf]

| Nick name | Start of migration | End of migration | Duration [days] | $\Delta_{\text{long}}$ [°] | Departure direction |
|-----------|--------------------|------------------|-----------------|----------------------------|---------------------|
| Aida      | 09/09/2012         | 14/10/2012       | 35              | -9.16                      | S-SE                |
| Anni      | 14/09/2013         | 19/10/2013       | 35              | -4.62                      | S-SE                |
| Edit      | 18/09/2013         | 29/10/2013       | 41              | -16.57                     | W-SW                |
| Ella      | 21/09/2013         | 24/10/2013       | 33              | -11.64                     | S-SE                |
| Gilda     | 15/09/2012         | 05/11/2012       | 51              | -22.23                     | W-SW                |
| Hans      | 22/09/2012         | 06/11/2012       | 45              | -15.26                     | W-SW                |
| Heidi     | 26/09/2013         | 22/10/2013       | 26              | -14.81                     | S-SE                |
| Jaana     | 11/09/2011         | 17/10/2011       | 36              | -18.47                     | S-SE                |
| Julia     | 20/09/2013         | 10/10/2013       | 20              | -4.51                      | S-SE                |
| Kirsi     | 13/09/2012         | 28/10/2012       | 45              | -12.26                     | S-SE                |
| Lars      | 15/09/2011         | 27/10/2011       | 42              | -17.28                     | S-SE                |
| Matti     | 10/09/2013         | 24/10/2013       | 44              | -32.75                     | W-SW                |
| Mohammed  | 07/09/2013         | 07/10/2013       | 30              | -8.11                      | S-SE                |
| Piff      | 15/09/2011         | 11/10/2011       | 26              | -18.23                     | S-SE                |
| Puff      | 16/09/2011         | 17/10/2011       | 31              | -18.91                     | S-SE                |
| Roosa     | 14/09/2011         | 08/10/2011       | 24              | -20.93                     | S-SE                |
| Rudolf    | 16/09/2012         | 03/11/2012       | 48              | -12.37                     | S-SE                |
| Senta     | 21/09/2012         | 19/10/2012       | 28              | -16.38                     | S-SE                |
| Tor       | 06/09/2012         | 08/10/2012       | 32              | -14.07                     | S-SE                |
| Ulla      | 14/09/2013         | 11/10/2013       | 27              | -6.57                      | S-SE                |
| Valentin  | 15/09/2012         | 05/11/2012       | 51              | -18.80                     | W-SW                |
| Venus     | 21/09/2012         | 25/10/2012       | 34              | -30.24                     | S-SE                |
| Viljo     | 24/09/2014         | 26/10/2014       | 32              | -25.17                     | S-SE                |

**Table S3** Timing, duration, total longitudinal displacement ( $\Delta_{\text{long}}$  [°]) and departure direction from Finland of 23 individuals that survived their first autumn migration and used for modelling  $\Delta_{\text{long}}$  as a function of mean wind conditions encountered en route and route choice at departure (excluding one of 24 survivors with large gaps in tracking data).
